# Supplementary material for: The pro-inflammatory signalling regulator Stat4 promotes vasculogenesis of great vessels derived from endothelial precursors
Source: PubMed Central journal article supplement (PMC5338034; doi:10.1038/ncomms14640), 2017-03-03
Supplement: ncomms14640-s1.pdf [file ncomms14640-s1.pdf]

# 1 Supplementary Information

|        |                                                                                                                  |     |
|--------|------------------------------------------------------------------------------------------------------------------|-----|
| hSTAT4 | MSCWVVOOITKFLKLVQFYDDNFMEIHLIAWTEGCKEASNEFMATILQNLITQIDEIGRVSEANLILHNLKRKVLICGFHCNEMHVIVISNCREERRITAAFN          | 120 |
| mSTAT4 | MSCWVVOOITKFLKLVQFYDDNFMEIHLIAWTEGCKEASNEFMATILQNLITQIDEIGRVSEANLILHNLKRKVLICGFHCNEMHVIVISNCREERRITAAFN          | 120 |
| zSTAT4 | MSCWVVOOITKFLKLVQFYDDNFMEIHLIAWTEGCKEASNEFMATILQNLITQIDEIGRVSEANLILHNLKRKVLICGFHCNEMHVIVISNCREERRITAAFN          | 117 |
| hSTAT4 | VEVCGFLERSVCSVSBRGRNVEHVAARKNVSCMTECDKYLEHLCQBEYRYKLCIMVCSKNSAMVQEVFLCBMINSIDFKRREALSMTQIIHSCIMNIVIEEIQDQR       | 240 |
| mSTAT4 | VEVCGFLERSVCSVSBRGRNVEHVAARKNVSCMTECDKYLEHLCQBEYRYKLCIMVCSKNSAMVQEVFLCBMINSIDFKRREALSMTQIIHSCIMNIVIEEIQDQR       | 240 |
| zSTAT4 | VEVCGFLERSVCSVAALRGRVLDNKVAVRVSVMILLAVYLEHLCQBEYRYKLCIMVCFLEKNSSSMDEVFLCBMINSIDFKRREALSMTADVIRHFAISSQNEIEKQR     | 237 |
| hSTAT4 | RCQIACIGGLHNGLDGLQNSFTLRSLEGLRFOLEKDEQSTKVFYEGDFIYQTHMIDRVTFLLNIEIRSEVVERQFCMPTEHGLVLRKLIQFTIIEILLRLEPLIIVQKVR   | 360 |
| mSTAT4 | RCQIACIGGLHNGLDGLQNSFTLRSLEGLRFOLEKDEQSTKVFYEGDFIYQTHMIDRVTFLLNIEIRSEVVERQFCMPTEHGLVLRKLIQFTIIEILLRLEPLIIVQKVR   | 360 |
| zSTAT4 | RCQIACIGGLVLTGLDGLQNSFTLRSLEGLRFOLEKDEQSTKVFYEGDFIYQTHMIDRVTFLLNIEIRSEVVERQFCMPTEHGLVLRKLIQFTIIEILLRLEPLIIVQKVR  | 357 |
| hSTAT4 | ASIEENVST.LSNEFVLCGTHVAVSSSESNCSLSVFRHILQKEMCSSAKCKNEGCHMVTPELHSIQEETQIQVCIITILEPSSLEWVWISNVSOLENNASLIWYVNSQNSQ  | 479 |
| mSTAT4 | ASIEENVST.LSNEFVLCGTHVAVSSSESNCSLSVFRHILQKEMCSSAKCKNEGCHMVTPELHSIQEETQIQVCIITILEPSSLEWVWISNVSOLENNASLIWYVNSQNSQ  | 479 |
| zSTAT4 | TTIEEDLPPGKVRSEFILLTNNKVCVEESTGOLSVEFRHILQKEMCSSAKCKNEGCHMVTPELHSIQEETQIQVCIITILEPSSLEWVWISNVSOLENNASLIWYVNSQNSQ | 475 |
| hSTAT4 | IIFENNPATLSCILKMSWCFSYVGRGLNSITIMIAKRTVCS.SYSGHLTWAKCKBHIKGRSEVWNIISFLDLIKKIEIHWIDGYVMGFVSKBRERILLRQEGFTLLR      | 598 |
| mSTAT4 | IIFENNPATLSCILKMSWCFSYVGRGLNSITIMIAKRTVCS.SYSGHLTWAKCKBHIKGRSEVWNIISFLDLIKKIEIHWIDGYVMGFVSKBRERILLRQEGFTLLR      | 598 |
| zSTAT4 | IIFENNPATLSCILKMSWCFSYVGRGLNSITIMIAKRTVCS.SYSGHLTWAKCKBHIKGRSEVWNIISFLDLIKKIEIHWIDGYVMGFVSKBRERILLRQEGFTLLR      | 595 |
| hSTAT4 | FSESHGGITFTWQHSSEVFRHLSVEFNRGRIKSALEADLRDKVMMAENIFENIKVLYPDIFKIDAGGHSQPCDLSRPTERGDGIVSVFIEISIRSDSTEFSESELL       | 718 |
| mSTAT4 | FSESHGGITFTWQHSSEVFRHLSVEFNRGRIKSALEADLRDKVMMAENIFENIKVLYPDIFKIDAGGHSQPCDLSRPTERGDGIVSVFIEISIRSDSTEFSESELL       | 718 |
| zSTAT4 | FSESHGGITFTWQHSSEVFRHLSVEFNRGRIKSALEADLRDKVMMAENIFENIKVLYPDIFKIDAGGHSQPCDLSRPTERGDGIVSVFIEISIRSDSTEFSESELL       | 705 |
| hSTAT4 | EMSESVAVIRENLSHTTIEIAMSISYA                                                                                      | 747 |
| mSTAT4 | EMSESVAVIRENLSHTTIEIAMSISYA                                                                                      | 747 |
| zSTAT4 | EMSEGMVEIITQELSEFEESAMSS...                                                                                      | 731 |

2

# 3 Supplementary Figure 1 Sequence alignment of human (h), mouse (m) and zebrafish (z) STAT4

4 proteins

5 Conserved residues are highlighted in the black background.

6

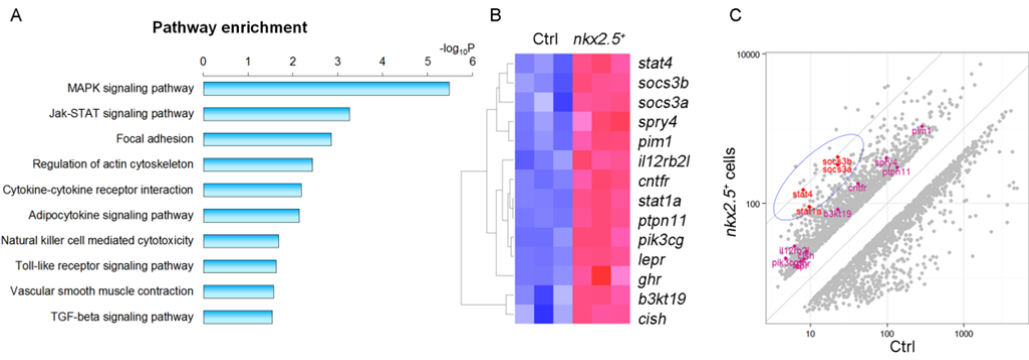

7

8 **Supplementary Figure 2 The microarray screen of potential regulators of *nkx2.5<sup>+</sup>* endothelial**  
 9 **progenitors**

10 (A) Pathway enrichment analysis of upregulated pathways in *nkx2.5<sup>+</sup>* cells at 30 hpf (B) Activated  
 11 genes in Jak-Stat signaling are listed in the heatmap (triplicates for each group)(C) Relative  
 12 expression levels of genes in the scatter plot and the activated genes in Jak-Stat signaling labelled  
 13 in red or pink.

14

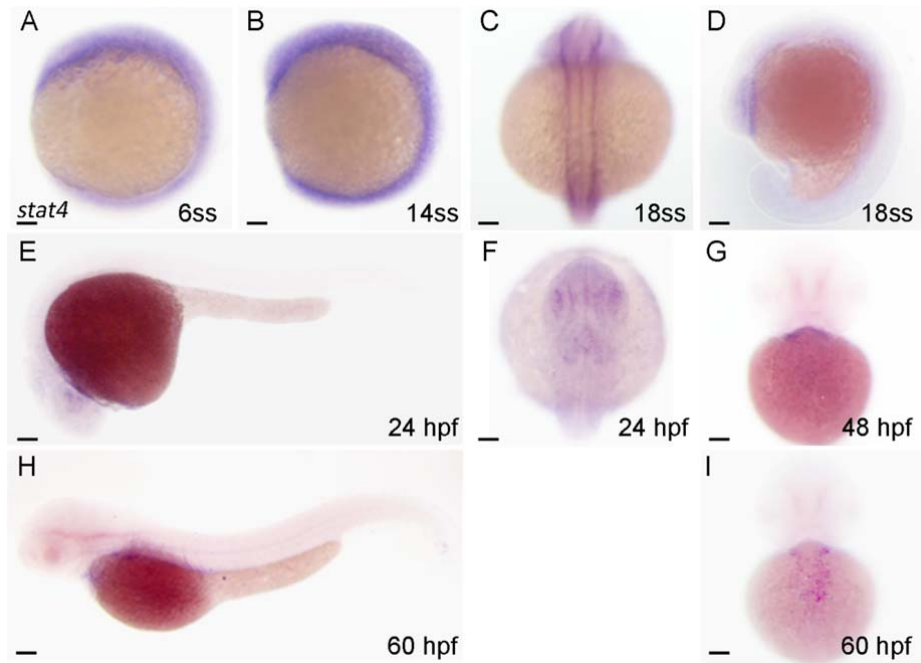

15

16 **Supplementary Figure 3 Developmental expression pattern of *stat4* transcripts**

17 (A-D) The expression of *stat4* transcripts in zebrafish embryos at 6 ss (A), 14 ss (B) and 18 ss (C, D).

18 (E, F) *In situ* hybridization at 24 hpf, (G) *in situ* hybridization for the expression of *stat4* at 48 hpf,

19 and (H, I) at 60 hpf. Scale bars, 50 μm. n ≥12 each group.

20

21

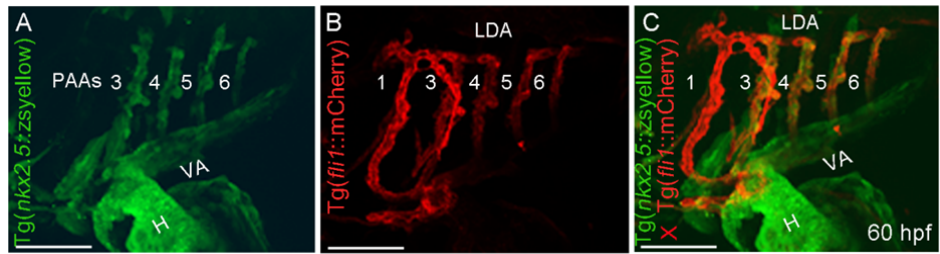

22

23 **Supplementary Figure 4 PAAs 3-6 derived from *nkx2.5*<sup>+</sup> cells**

24 (A) A *Tg(nkx2.5:ZsYellow)* embryo exhibits yellow fluorescence in pharyngeal arch arteries at 60  
25 hpf. (B) Red fluorescence labels the endothelium of PAAs 1-6 in a *Tg(kdr1:mCherry)* embryo. (C) A  
26 *Tg(nkx2.5:ZsYellow)* embryo exhibiting yellow fluorescence overlapped red fluorescence in PAAs  
27 3-6 of *Tg(kdr1:mCherry)* embryo. Scale bars, 50  $\mu$ m. VA, ventral aorta; LDA, lateral dorsal aorta; H,  
28 heart. n =12.

29

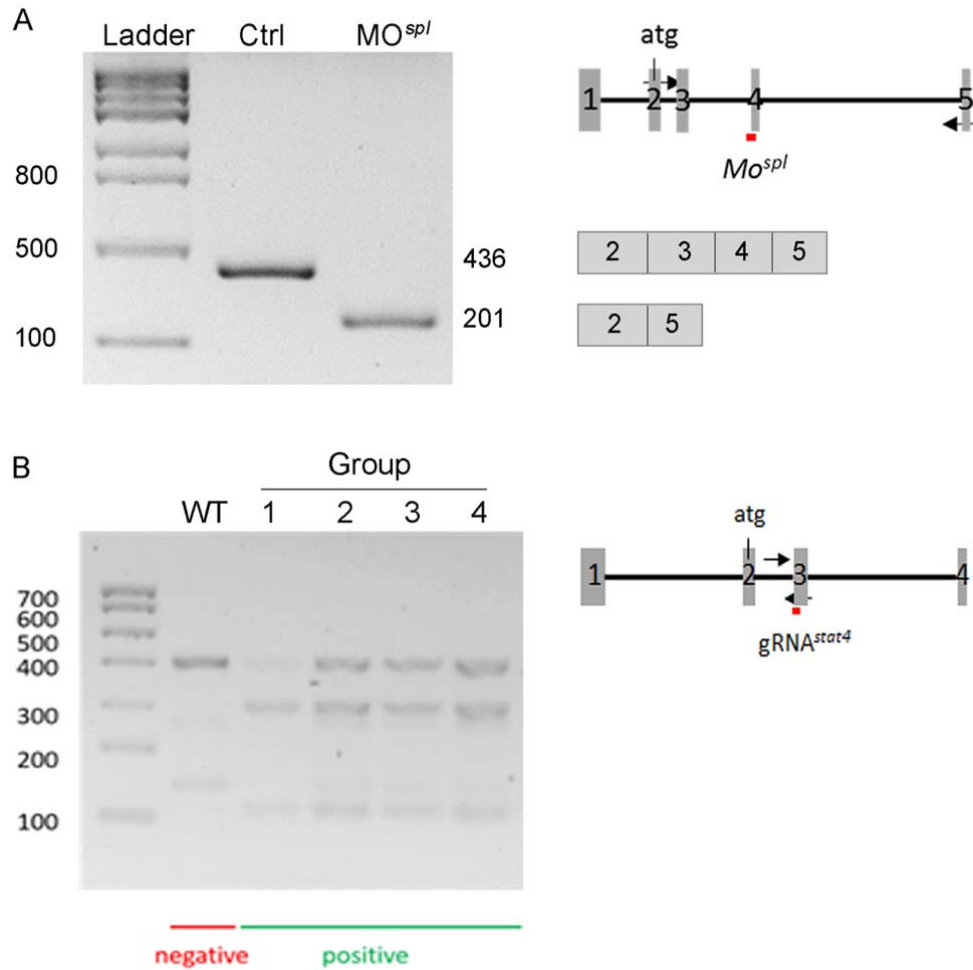

30

31 **Supplementary Figure 5 Effective study of *stat4* morpholino and CRISPR/Cas mutagenesis**

32 (A) A splice morpholino ( $MO^{spl}$ ), targeting the splice acceptor site for intron 3 of *stat4*. RT-PCR  
 33 shows that the control embryos express normal *stat4* transcripts, while morphants show the  
 34 improperly spliced *stat4* mRNAs without exons 3 and 4. (B) A schematic diagram clarifies the  
 35 target site of the *stat4* gRNA targeting exon. The T7 endonuclease I (T7E1) efficacy assay depicts  
 36 the mutagenesis efficiency in *stat4* gRNA injected zebrafish embryos.

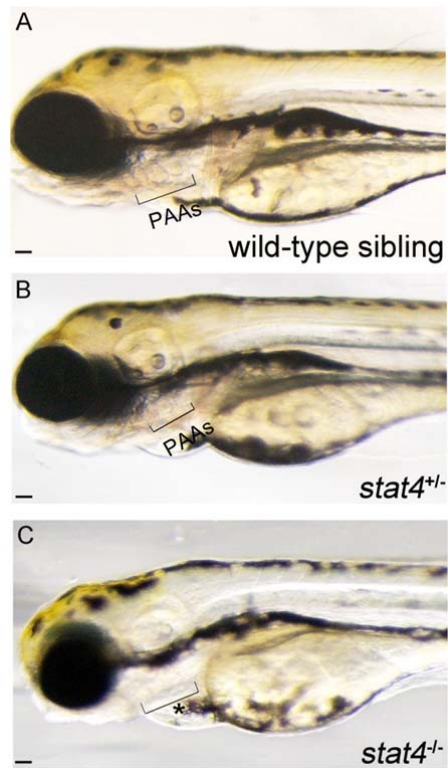

37

38 **Supplementary Figure 6 The morphological phenotypes of *stat4* mutants**

39 The wild-type siblings, the heterozygotes (*stat4*<sup>+/-</sup>) and homozygotes (*stat4*<sup>-/-</sup>) are imaged at 72  
40 hpf under bright field. The pharyngeal regions and PAAs 3-6 are indicated with brackets. Scale  
41 bars, 50  $\mu$ m. n  $\geq$ 9 in each group.

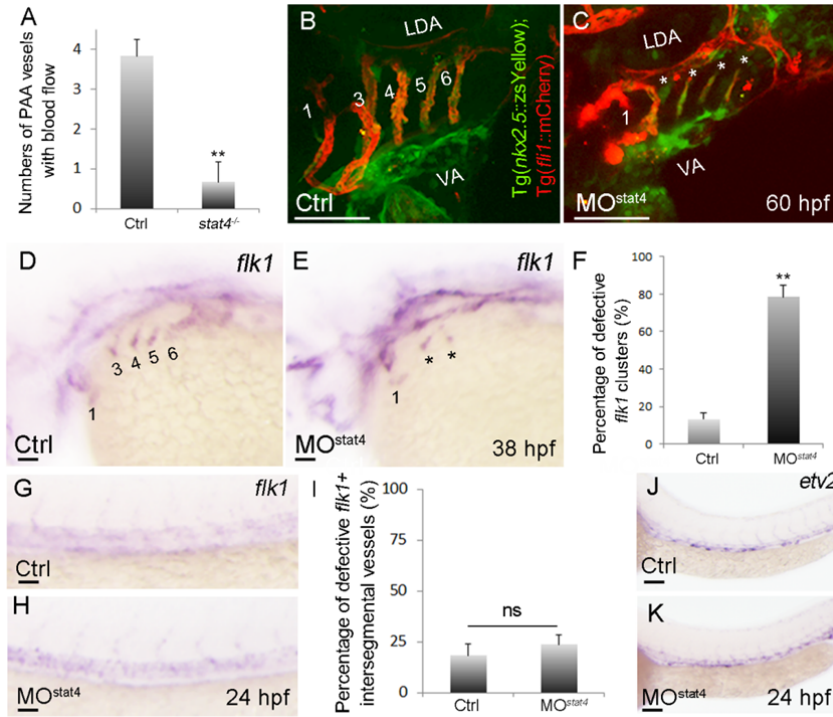

42

43 **Supplementary Figure 7 Suppression of *stat4* does not affect other blood vessels and**  
 44 **angiogenesis**

45 (A) Quantification of PAAs numbers that support the blood flow in the control and  
 46 *stat4*<sup>-/-</sup>;Tg(*flj1*:EGFP);Tg(*gata1*:DsRed) line (n =20 per each group, Error bars indicate the standard  
 47 deviation. Kruskal–Wallis test, \*\* *P* =0.002). (B, C) The control and *stat4* morphant embryos of  
 48 the Tg(*nkx2.5*:ZsYellow);Tg(*kdrl*:mCherry) line present *nkx2.5* derivatives (yellow) and endothelial  
 49 cells (red) at 60 hpf. n =20 embryos per each group (D-F) Analysis of the expression of *flk1* in  
 50 pharyngeal angioblastic cords is conducted in control embryos (D) and *stat4* morphant embryos  
 51 (E) at 38 hpf. (F) Percentage of embryos with defective *flk1*<sup>+</sup> PAA angioblastic cords in the control  
 52 and *stat4* morphant embryos. n =30 per each group, Error bars indicate the standard deviation.  
 53 Kruskal–Wallis test, \*\* *P* =0.0057 (G,H) The dorsal aorta and posterior cardinal vein as well as  
 54 intersegmental vessels are assessed by *in situ* hybridization of *flk1* transcripts in the control (G)  
 55 and *stat4* morphant (H) embryos at 24 hpf. (I) Quantification analysis of the defective *flk1*<sup>+</sup>  
 56 intersegmental vessels, n =20 per each group, Error bars indicate the standard deviation. Kruskal–  
 57 Wallis test, n.s.: *P* =0.37. (J, K) *In situ* hybridization of *etv2* shows the effects of *stat4* knock down  
 58 on other somatic vasculatures at 24 hpf. Scale bars, 50 μm. n ≥20 each group.

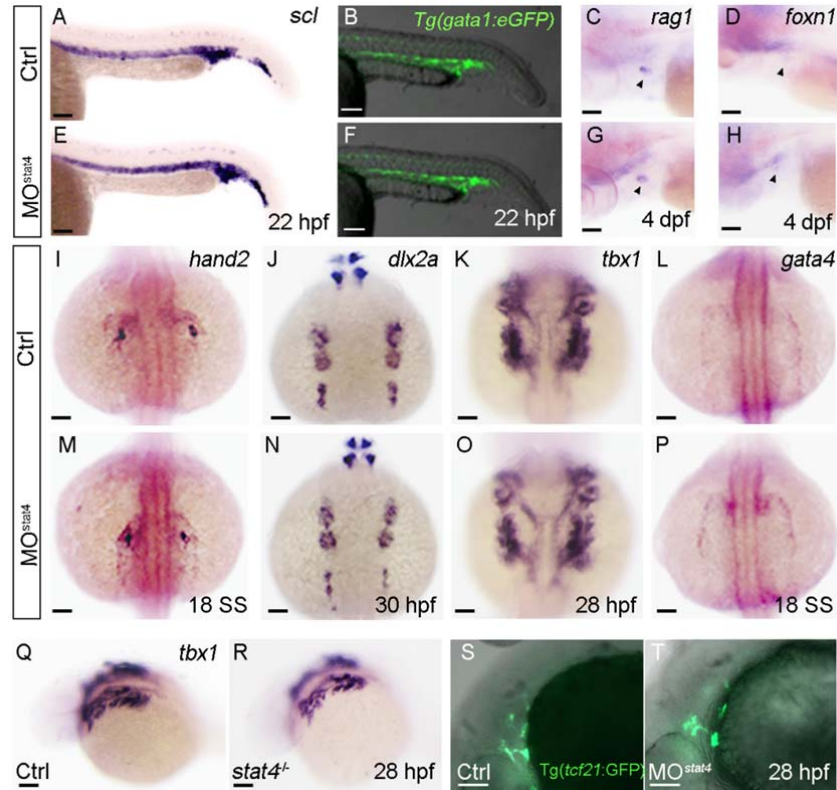

59

60 **Supplementary Figure 8 Suppression of *stat4* does not affect hematopoiesis, pharyngeal**  
 61 **mesenchyme, thymus or heart morphogenesis**

62 (A, E) the control (A) and *stat4* morphant (E) embryos are examined by *scl* *in situ* hybridization  
 63 for ICM at 22 hpf. (B, F) Erythroid blood flow labeled by *gata1* is imaged in the control (B) and  
 64 *stat4* morphants (F) Tg(*Gata1*:EGFP) embryos at 22 hpf. (C, D, G, H) *In situ* hybridization of the T  
 65 lymphocyte marker *rag1* (C, G) and thymic epithelial marker *foxn1* (D, H) in the control and *stat4*  
 66 morphant embryos at 4 dpf. Arrows label T lymphocytes (C, G) and thymic epithelial cells (D, H).  
 67 (I-P) The control (I, J) and *stat4* morphant embryos (M, N) are subjected to *in situ* hybridization  
 68 for neural crest marker *hand2* (I, M) at 18 ss and *dlx2a* (J, N) at 30 hpf, respectively. (K, O) The  
 69 control and *stat4* morphant embryos are examined by the expression of *tbx1* in the pharyngeal  
 70 ectoderm and endoderm at 28 hpf. (L, P) Analysis of the distribution of *gata4* transcripts in the  
 71 anterior lateral plate mesoderm (ALPM) at 18 ss. n ≥ 20 per each group. (Q, R) The control and  
 72 *stat4* mutant embryos are examined by *in situ* hybridization of *tbx1* transcripts at 28 hpf. n =30  
 73 per each group. (S, T) Fluorescent images of PAAs in the control (Ctrl) and *stat4* morphant  
 74 embryos of the Tg(*tcf21*: GFP) line at 28 hpf. Scale bars, 50 μm. n =40 per each group.



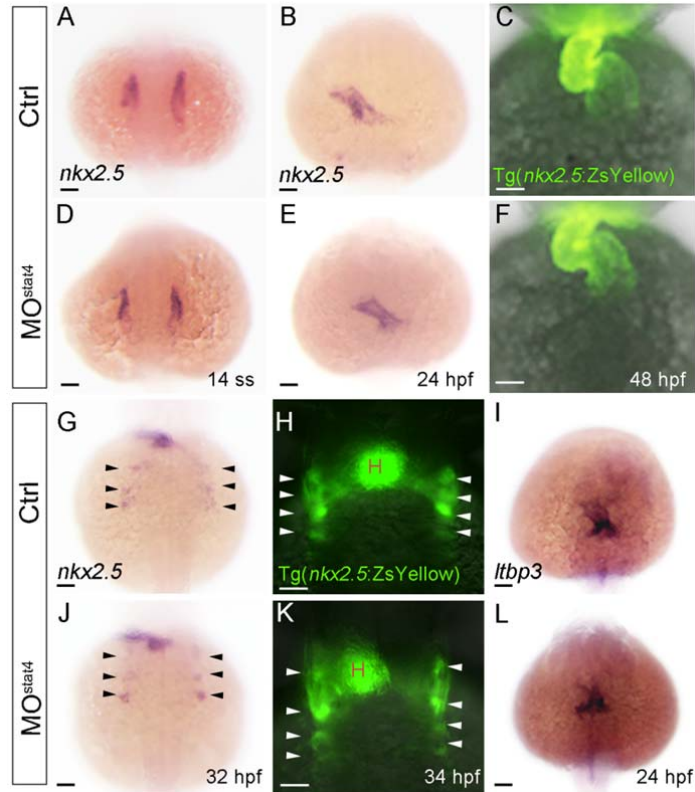

75

76 **Supplementary Figure 9 Effects of *stat4* deficiency on *nkx2.5*<sup>+</sup> cardiac progenitors and**  
 77 **endothelial precursors**

78 (A, B, D, E) *In situ* hybridization detects *nkx2.5* transcripts in the control and *stat4* morphant  
 79 embryos at the 14 ss (A, D) and at 24 hpf (B, E). (C, F) ZsYellow<sup>+</sup> populations in the heart of the  
 80 control and *stat4* morphant embryos of the Tg(*nkx2.5*:ZsYellow) line are imaged at 48 hpf. (G, J)  
 81 The *nkx2.5*<sup>+</sup> mesodermal endothelial precursors in the control and *stat4* morphant embryos are  
 82 analyzed by *in situ* hybridization at 32 hpf. (H, K) The ZsYellow<sup>+</sup> population in the pharynx of the  
 83 control and *stat4* morphant embryos of the Tg(*nkx2.5*:ZsYellow) line is imaged at 34 hpf.  
 84 Arrowheads indicate the pharyngeal clusters. (I, L) *In situ* hybridization detects *Itbp3*<sup>+</sup> transcripts,  
 85 which label the second heart field in the control and *stat4* morphant embryos at 24 hpf. Scale  
 86 bars, 50 μm. n ≥12 in each group.

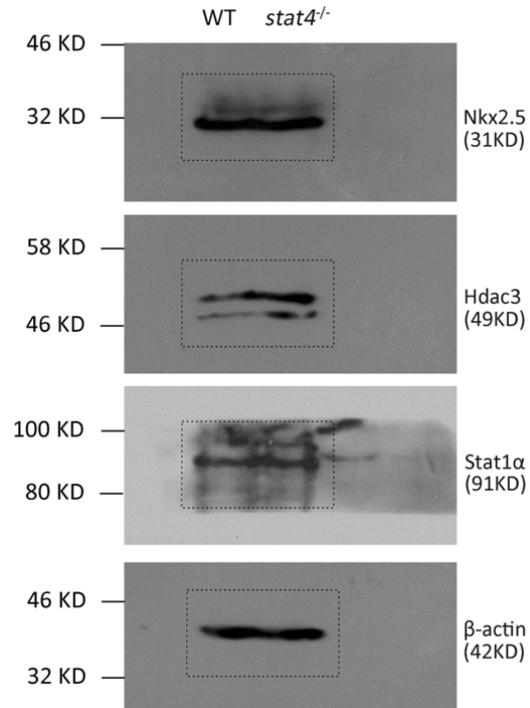

87

88 **Supplementary Figure 10 Original scans of immuno-blots in the main Figure**

89 Dotted boxes indicate the area that is shown in the main Figure 7P.

90

91

92

93

94

95 **Supplementary Table 1**

| Alleles                    | Sequence                                                                 | Deletion/<br>Insertion |
|----------------------------|--------------------------------------------------------------------------|------------------------|
| <i>stat4</i> <sup>wt</sup> | <u>GGCTCAGGGAAACGGCATCAAACCATGAAT</u> CTATGGCTACTGTACTCTTCAATAACTTCCTC   | wt                     |
| <i>stat4</i> <sup>m1</sup> | <u>GGCTCAGGGAAACGGCATCAAACCATGAAT</u> --ATGGCTACTGTACTCTTCAATAACTTCCTC   | Δ2                     |
| <i>stat4</i> <sup>m2</sup> | <u>GGCTCAGGGAAACGGCATCAAACCATGAAT</u> TCCAATGGCTACTGTACTCTTCAATAACTTCCTC | Δ2+4                   |
| <i>stat4</i> <sup>m3</sup> | <u>GGCTCAGGGAAACGGCATCAAACCATGA</u> ---ATGGCTACTGTACTCTTCAATAACTTCCTC    | Δ4                     |
| <i>stat4</i> <sup>m4</sup> | <u>GGCTCAGGGAAACGGCATCAAAC</u> T-----ATGGCTACTGTACTCTTCAATAACTTCCTC      | Δ8 +1                  |
| <i>stat4</i> <sup>m5</sup> | <u>GGCTCAGGGAAACGGCATCAAAC</u> CATGAATAACTATGGCTACTGTACTCTTCAATAACTTCCTC | +11                    |

96 – Deletion, Insertion, PAM

97

98 **Supplementary Table 2**

| <b>Primer name</b> | <b>Sequence (5'- 3')</b>         | <b>Description</b>         |
|--------------------|----------------------------------|----------------------------|
| <i>spl mo F</i>    | TTCAGCAACTGGATATTAAGTTCCTCGAA    | <i>stat4</i> MO evaluation |
| <i>spl mo R</i>    | TGAACGCTGCTTCTTATCACAGCC         | <i>stat4</i> MO evaluation |
| <i>stat4 F</i>     | CCGGAATTCCTCAAGTTCTGCAAGGAGGTCAT | in situ probe              |
| <i>stat4 R</i>     | CGGGGTACCCCTCAGCCTTTACAGACAATGG  | in situ probe              |
| <i>hand2 F</i>     | CGGGGTACCTGCTTACTAACCGTGCCACTCT  | in situ probe              |
| <i>hand2 R</i>     | GCTCTAGAACCATTGCACTACGGAGGAG     | in situ probe              |
| <i>tie1 F</i>      | CCGGAATTCGACCTTATGAGCGACCGCCATT  | in situ probe              |
| <i>tie1 R</i>      | CGGGGTACCTTGCATCCACAGCCAAGCCTT   | in situ probe              |
| <i>flk1 F</i>      | CACTCAATTCAGCCCATTACT            | in situ probe              |
| <i>flk1 R</i>      | TTCTAAGGGCCACAACTTTG             | in situ probe              |
| <i>gata4 F</i>     | CCGGAATTCGGCGTCTGGACTCTGGAT      | in situ probe              |
| <i>gata4 R</i>     | GGGGTACCTCACTCTTGGTGCTGGAGGATC   | in situ probe              |
| <i>nkx2.5 F</i>    | CCGGAATTCGCAAGAGGCAGCGTCAGGAT    | in situ probe              |
| <i>nkx2.5 R</i>    | CGGGGTACCAAGTCGGAGCCGTGTTTCGT    | in situ probe              |
| <i>tbx1 F</i>      | CGGAATTCTCCAATTGCTCCTCGTCGTC     | in situ probe              |
| <i>tbx1 R</i>      | GGGGTACCCAATTCCAGTCCGTGATAATGC   | in situ probe              |
| <i>dlx2a F</i>     | GCTCTAGAGCTCCTGCTCCTCACCAACT     | in situ probe              |
| <i>dlx2a R</i>     | GGGGTACCGGACACATACAAGACGGACACC   | in situ probe              |
| <i>etv2 F</i>      | GCTCTAGAGTTCCTGCTGGTTTCGACTTC    | in situ probe              |
| <i>etv2 R</i>      | GGGGTACCGGTTTTCTAAAGGCACCTAGCTTG | in situ probe              |
| <i>scl F</i>       | GATGCAACTCTAGTGCGGGACG           | in situ probe              |
| <i>scl R</i>       | AGGAACGAGACTGCACAAATGA           | in situ probe              |
| <i>foxn1 F</i>     | CCGGAATTCCTCAAGTTCTGCAAGGAGGTCAT | in situ probe              |
| <i>foxn1 R</i>     | CGGGGTACCCCTCAGCCTTTACAGACAATGG  | in situ probe              |
| <i>rag1 F</i>      | TACAGCTACAACCTCTCAGCAA           | in situ probe              |
| <i>rag1 R</i>      | AATTCCTGTGGGACCAGTAAG            | in situ probe              |
| <i>stat4 F</i>     | CCGGAATTCCTCAAGTTCTGCAAGGAGGTCAT | mRNA                       |

---

|                                           |                                 |               |
|-------------------------------------------|---------------------------------|---------------|
| <b><i>stat4 R</i></b>                     | CGGGGTACCCCTCAGCCTTTACAGACAATGG | mRNA          |
| <b><i>nkx2.5 F</i></b>                    | CGGAATTCATGGCAATGTTCTCTAGCCAA   | mRNA          |
| <b><i>nkx2.5 R</i></b>                    | GCTCTAGATCACCAAGCTCTGATGCCATG   | mRNA          |
| <b><math>\Delta</math> <i>stat4 F</i></b> | CTAGCTAGCATGGCTACTGTACTCTTCAAT  | mRNA          |
| <b><math>\Delta</math> <i>stat4 R</i></b> | CTAGCTAGCGGGTGAACCTCATAGCGCTCTC | mRNA          |
| <b><i>pias2 F</i></b>                     | ATGGCGGATATTGAGGAGTTACG         | mRNA          |
| <b><i>pias2 R</i></b>                     | TCAGTCCAGGGAGATAATGTCTG         | mRNA          |
| <b><i>hdac3 F</i></b>                     | ATGACCAATCGAACTGCGTACT          | mRNA          |
| <b><i>hdac3 R</i></b>                     | TCAGATCTCCACATCACTTTCT          | mRNA          |
| <b><i>socs3a F</i></b>                    | ATGATAACCCACAGCAAGTTGG          | mRNA          |
| <b><i>socs3a R</i></b>                    | TTAAATAGGGGCGTCATACTCCTG        | mRNA          |
| <b><i>socs3b F</i></b>                    | ATGGTAACGCATAGTAGGCTTG          | mRNA          |
| <b><i>socs3b R</i></b>                    | CTAGATGGGAGCATCGTACTCC          | mRNA          |
| <b><i>ctrl MO</i></b>                     | CCTCTTACCTCAGTTACAATTTATA       | morpholino    |
| <b><i>stat4 MO</i></b>                    | GTATTTACCTGGGAGAATAGAAGA        | morpholino    |
| <b><i>nkx2.5 MO</i></b>                   | TGTCAAGGCTCACCTTTTTTCTCTT       | morpholino    |
| <b><i>stat1a MO</i></b>                   | GCTGAAGCTCCAACCACTGAGTCAT       | morpholino    |
| <b><i>stat1b MO</i></b>                   | GCTGGTTCCAGAGCGTCATCTTTCA       | morpholino    |
| <b><i>hdac3 MO</i></b>                    | AGAAGTACGCAGTTCGATTGGTCAT       | morpholino    |
| <b><i>stat1a F</i></b>                    | TTCGCGAGGAAAGAAAGATT            | Real-time PCR |
| <b><i>stat1a R</i></b>                    | GGGTTCGGTGTTGGACTCT             | Real-time PCR |
| <b><i>stat1b F</i></b>                    | TGGTCGCTACTATACCAGTGAATC        | Real-time PCR |
| <b><i>stat1b R</i></b>                    | TGCATCTGAGTTGATGGGTTT           | Real-time PCR |
| <b><i>cdk2 F</i></b>                      | AAAGAGCTCAATCACCCCTAACA         | Real-time PCR |
| <b><i>cdk2 R</i></b>                      | AGACGTCGAGTCCATAAACC            | Real-time PCR |
| <b><i>cdkn1ca F</i></b>                   | TATTCGGACCCGTAGACCATG           | Real-time PCR |
| <b><i>cdkn1ca R</i></b>                   | CAGGCAAAGGCGAGTTGGTC            | Real-time PCR |
| <b><i>cdkn2a/b F</i></b>                  | GGATGAACTGACCACAGCAG            | Real-time PCR |
| <b><i>cdkn2a/b R</i></b>                  | AGGCGTTCTTCTAAATTTGT            | Real-time PCR |

---

---

|                           |                             |               |
|---------------------------|-----------------------------|---------------|
| <b><i>hdac3 F</i></b>     | AGATACACAGGTGCCTCATT        | Real-time PCR |
| <b><i>hdac3 R</i></b>     | ACAAAATCCAGATGCCTCAAAC      | Real-time PCR |
| <b><i>atrip F</i></b>     | ACGTTTCATGACGAAGGAAAAC      | Real-time PCR |
| <b><i>atrip R</i></b>     | TCGCTGCTCTTCTGGGAGTA        | Real-time PCR |
| <b><i>gapdh F</i></b>     | TTGAGAAACCTGCCAAGTATGA      | Real-time PCR |
| <b><i>gapdh R</i></b>     | CCCATTGAAGTCAGTGGACA        | Real-time PCR |
| <b><i>stat4 P1 F</i></b>  | TCAGTTCTGAACAACCTCATTGTG    | ChIP          |
| <b><i>stat4 P1 R</i></b>  | CATGCACCACACACTTACACC       | ChIP          |
| <b><i>stat4 P2 F</i></b>  | TTAGATCTCTCCTTCATTAGCGTAGA  | ChIP          |
| <b><i>stat4 P2 R</i></b>  | CAGGTACTGCCCTAAAACCTAATGG   | ChIP          |
| <b><i>stat4 P3 F</i></b>  | TTCATGTGTATAACTCTCAGTGCATTA | ChIP          |
| <b><i>stat4 P3 R</i></b>  | CGCTATCGATGAATATGGAAAA      | ChIP          |
| <b><i>stat4 P4 F</i></b>  | GGTGAAGCAGGAGCATTGAG        | ChIP          |
| <b><i>stat4 P4 R</i></b>  | TTACCTGTTGCCCTTTTAAGAGAC    | ChIP          |
| <b><i>stat4 P5 F</i></b>  | GTAGCATGATCGCAGTGAGG        | ChIP          |
| <b><i>stat4 P5 R</i></b>  | CACTGAAATGCCAACTGACC        | ChIP          |
| <b><i>hdac3 P1 F</i></b>  | GAATTGCCTCATGTGCTTTTT       | ChIP          |
| <b><i>hdac3 P1 R</i></b>  | GGATGCTGCTTAAATCTGATAAAAATA | ChIP          |
| <b><i>hdac3 P2 F</i></b>  | AGCTCAAACCGATCTGGTCA        | ChIP          |
| <b><i>hdac3 P2 R</i></b>  | GAATTTGCTGATCTACTGGG        | ChIP          |
| <b><i>hdac3 P3 F</i></b>  | TCCGTTTCATCTTTTTAACCTTG     | ChIP          |
| <b><i>hdac3 P3 R</i></b>  | AGATCCCAGTGCATGAATT         | ChIP          |
| <b><i>hdac3 P4 F</i></b>  | TGTATGAATTGATTATGTGGTGAAAAT | ChIP          |
| <b><i>hdac3 P4 R</i></b>  | ACCCTATAAAGTGGCTGGTGAG      | ChIP          |
| <b><i>hdac3 P5 F</i></b>  | TGCCAAATTTTTACCCTACCA       | ChIP          |
| <b><i>hdac3 P5 R</i></b>  | GGGAACTGAGGTTACGATTC        | ChIP          |
| <b><i>hdac3 P6 F</i></b>  | GACCAATTTCTGGCACCAAC        | ChIP          |
| <b><i>hdac3 P6 R</i></b>  | TGCAATTTAAACCGAACATGG       | ChIP          |
| <b><i>stat1a P1 F</i></b> | CAACTGGTTTTAGAATAACTTGCAGA  | ChIP          |

---

---

|                           |                            |      |
|---------------------------|----------------------------|------|
| <b><i>stat1a P1 R</i></b> | TCATTGCTTGTTTTATGGAATGTC   | ChIP |
| <b><i>stat1a P2 F</i></b> | GTCAAAGTCAGGGAGGTGGT       | ChIP |
| <b><i>stat1a P2 R</i></b> | CTTTGCAACCACACAAAAC        | ChIP |
| <b><i>stat1a P3 F</i></b> | TGATAAAATAAGCATCTTTTTCTGCT | ChIP |
| <b><i>stat1a P3 R</i></b> | AGTGTGGAATTTTGTGCCTG       | ChIP |
| <b><i>stat1a P4 F</i></b> | AGCACACAAGCTCAAAACACC      | ChIP |
| <b><i>stat1a P4 R</i></b> | TCGATGAGCAAGTGTGTAGGAA     | ChIP |
| <b><i>stat1a P5 F</i></b> | CCTGCGGATTCTCACTGTAC       | ChIP |
| <b><i>stat1a P5 R</i></b> | ACGACGCATTGATCCAACAT       | ChIP |

---

99 F, forward primer; R, reverse primer

100
